# Supplementary material for: Factors Influencing the Implementation of Remote Delivery Strategies for Non-Communicable Disease Care in Low- and Middle-Income Countries: A Narrative Review
Source: PubMed Central journal article supplement (PMC9272771; doi:10.3389/phrs.2022.1604583), 2022-06-27
Supplement: DataSheet4.pdf [file DataSheet4.pdf]

### Supplementary Material 4: Summary of study characteristics

| Author, Date, Reference        | Study title                                                                                                                                                                    | Country (level of income <sup>1</sup> ) | Disease targeted <sup>2</sup>                                                              | Delivery approach(es)                    | Key health care services delivered through the approach                                                                                                                                                                                                                                                       |
|--------------------------------|--------------------------------------------------------------------------------------------------------------------------------------------------------------------------------|-----------------------------------------|--------------------------------------------------------------------------------------------|------------------------------------------|---------------------------------------------------------------------------------------------------------------------------------------------------------------------------------------------------------------------------------------------------------------------------------------------------------------|
| 1.<br>(Abdel-All et al., 2018) | Evaluation of a training program of hypertension for accredited social health activists (ASHA) in rural India                                                                  | India<br>(LMIC)                         | HTN                                                                                        | Community-based (including task-sharing) | CHWs – <b>support for self-management</b> :<br>- Education support groups (HTN and its management, promotion of healthy lifestyle)<br>- Disease monitoring: clinical measurements (BP, weight)                                                                                                                |
| 2.<br>(Amarchand et al., 2015) | Lessons for addressing noncommunicable diseases within a primary health-care system from the Ballabgarh project, India                                                         | India<br>(LMIC)                         | Common NCDs (HTN, DM and CAD)                                                              | Community-based                          | CHWs:<br>- NCD risk assessment & referral<br>- Promotion of healthy lifestyle<br>- Disease monitoring: medication adherence                                                                                                                                                                                   |
| 3.<br>(Ameh et al., 2017)      | Quality of integrated chronic disease care in rural South Africa: user and provider perspectives                                                                               | South Africa<br>(UMIC)                  | Chronic diseases (HIV/ AIDS, TB, HTN, DM, COPD, asthma, epilepsy, mental health illnesses) | Community-based (including task-sharing) | CHWs – <b>Assisted' self-management</b> :<br>- Health promotion and education<br>- Disease monitoring: BP and blood sugar monitoring assistance<br>- Home-delivery of medication                                                                                                                              |
| 4.<br>(Barsky et al., 2019)    | Analysis of the Implementation, User Perspectives, and Feedback From a Mobile Health Intervention for Individuals Living With Hypertension (DREAM-GLOBAL): Mixed Methods Study | Tanzania<br>(LIC)<br>(Canada (HIC))     | HTN                                                                                        | E-health (mHealth, telemonitoring)       | Mobile health intervention:<br>- Mobile phone app for trained CHW or nurses to link the mobile phone to the BP measurement device and allow transmission of the reading to the central server<br>- SMS text messaging-based system: passive (promotion of healthy lifestyle) and active (based on BP results) |
| 5.<br>(Baumann et al., 2015)   | A Demonstration of Peer Support for Ugandan Adults With Type 2 Diabetes                                                                                                        | Uganda<br>(LIC)                         | DM (type 2)                                                                                | Community-based                          | <b>Peer support</b> intervention by nurse-led team:<br>- Training of peers and champions, provision of materials (including a phone)<br>- Regular phone or personal contacts: assistance in applying disease management or prevention                                                                         |

|                                          |                                                                                                                                                                                             |                                                                                                                           |                                                  |                                               |                                                                                                                                                                                                                                                                                                                                                                                  |
|------------------------------------------|---------------------------------------------------------------------------------------------------------------------------------------------------------------------------------------------|---------------------------------------------------------------------------------------------------------------------------|--------------------------------------------------|-----------------------------------------------|----------------------------------------------------------------------------------------------------------------------------------------------------------------------------------------------------------------------------------------------------------------------------------------------------------------------------------------------------------------------------------|
|                                          |                                                                                                                                                                                             |                                                                                                                           |                                                  |                                               | in daily life, emotional and social support, linkage to clinical care, and ongoing support                                                                                                                                                                                                                                                                                       |
| 6.<br>(Brandt et al., 2019)              | Addressing Depression Comorbid With Diabetes or Hypertension in Resource-Poor Settings: A Qualitative Study About User Perception of a Nurse-Supported Smartphone App in Peru               | Peru<br>( <i>UMIC</i> )                                                                                                   | Depression in people living with DM and / or HTN | E-health<br>( <i>web-based intervention</i> ) | Nurse supported smartphone app to address depression comorbid with DM and/or HTN:<br>- App using behavioural activation approach (text and videos), and interactive elements (notification, dialogue pop-ups)<br>- Nurse dashboard to monitor participants participations                                                                                                        |
| 7.<br>(DePue et al., 2013)               | Implementation of a Culturally Tailored Diabetes Intervention With Community Health Workers in American Samoa                                                                               | American Samoa<br>( <i>LMIC</i> )                                                                                         | DM (type 2)                                      | Community-based                               | Nurse-CHW team – <b>support for self-management:</b><br>- Use of algorithm to determine risk profile and visit schedule<br>- Regular (individual and group) visits to patients – health promotion and education, safety monitoring and urgent referral                                                                                                                           |
| 8.<br>(Do Valle Nascimento et al., 2017) | A pilot study of a Community Health Agent-led type 2 diabetes self-management program using Motivational Interviewing-based approaches in a public primary care center in São Paulo, Brazil | Brazil<br>( <i>UMIC</i> )                                                                                                 | DM (type 2)                                      | Community-based                               | Community health agents (CHA) – <b>support for self-management:</b><br>- Use of motivational interviewing approaches to support DM patients’ self-management as part of routine service delivery in their mandatory monthly home visits                                                                                                                                          |
| 9.<br>(Fisher et al., 2012)              | Peer Support For Self-Management Of Diabetes Improved Outcomes In International Settings                                                                                                    | Cameroon<br>( <i>LMIC</i> )<br>South Africa<br>( <i>UMIC</i> )<br>Thailand<br>( <i>UMIC</i> )<br>Uganda<br>( <i>LIC</i> ) | DM (type not specified)                          | Community-based                               | <b>Peer support</b> for self-management programmes implemented in 4 countries:<br>- “Peer supporters” or “peer champions” provide support to “partners” (face to face meetings of phone contacts): disease management, healthy lifestyle<br>- Thailand: village health volunteers led meetings and supported the intervention implementation<br>- Cooking sessions, shared meals |

|                                |                                                                                                                                                      |                                                                   |             |                                      |                                                                                                                                                                                                                                             |
|--------------------------------|------------------------------------------------------------------------------------------------------------------------------------------------------|-------------------------------------------------------------------|-------------|--------------------------------------|---------------------------------------------------------------------------------------------------------------------------------------------------------------------------------------------------------------------------------------------|
| 10.<br>(Flood et al., 2017)    | A quality improvement project using statistical process control methods for type 2 diabetes control in a resource-limited setting                    | Guatemala<br>(LMIC)                                               | DM (type 2) | Community-based                      | <b>Home-based DM education programme</b> targeting patients and family members delivered by a nurse educator                                                                                                                                |
| 11.<br>(Haddad et al., 2014)   | A Feasibility Study of Mobile Phone Text Messaging to Support Education and Management of Type 2 Diabetes in Iraq                                    | Iraq<br>(LMIC)                                                    | DM (type 2) | E-health<br>(mHealth)                | Mobile health intervention:<br>- SMS text messages sent weekly using a website to support DM self-management. Education-related themes: diet, treatment, complication awareness, blood glucose monitoring, enhancement of clinic attendance |
| 12.<br>(Huang et al., 2014)    | Use of family member-based supervision in the management of patients with hypertension in rural china                                                | China<br>(UMIC)                                                   | HTN         | Community-based                      | <b>Family-based supervision programme:</b><br>- A family member was selected as the observer to supervise patient's treatment, and remind patients to seek timely health care and to get their BP monitored on a regular basis              |
| 13.<br>(Jafar et al., 2016)    | Control of blood pressure and risk attenuation: a public health intervention in rural Bangladesh, Pakistan, and Sri Lanka: feasibility trial results | Bangladesh<br>(LMIC)<br>Pakistan<br>(LMIC)<br>Sri Lanka<br>(LMIC) | HTN         | Community-based                      | <b>Home health education</b> by government CHWs and documentation using checklist                                                                                                                                                           |
| 14.<br>(Jafari et al., 2016)   | Exploring educational needs and design aspects of internet-enabled patient education for persons with diabetes: a qualitative interview study        | Iran<br>(UMIC)                                                    | DM (type 2) | E-health<br>(web-based intervention) | The study explores educational needs and design features of personalised Internet-enabled education for patients with DM to enhance self-care management                                                                                    |
| 15.<br>(Kulnawan et al., 2011) | Development of diabetes telephone-linked care system for self-management support and acceptability test among type 2 diabetic patients.              | Thailand<br>(LMIC or UMIC)                                        | DM (type 2) | E-health<br>(mHealth)                | Mobile (or home) telephone health intervention:<br>- Telephone-linked care system using interactive voice response for DM self-management education and support                                                                             |
| 16.<br>(Lee J Y et al., 2015)  | Diabetes telemonitoring reduces the risk of hypoglycaemia during Ramadan: a pilot randomized controlled study                                        | Malaysia<br>(UMIC)                                                | DM (type 2) | E-health<br>(telemonitoring)         | DM telemonitoring programme:<br>- Education on DM management                                                                                                                                                                                |

|                                    |                                                                                                                                                                                   |                                                       |                                      |                                                                                          |                                                                                                                                                                                                                                                                                                                                                                           |
|------------------------------------|-----------------------------------------------------------------------------------------------------------------------------------------------------------------------------------|-------------------------------------------------------|--------------------------------------|------------------------------------------------------------------------------------------|---------------------------------------------------------------------------------------------------------------------------------------------------------------------------------------------------------------------------------------------------------------------------------------------------------------------------------------------------------------------------|
|                                    |                                                                                                                                                                                   |                                                       |                                      |                                                                                          | <ul style="list-style-type: none"> <li>- Self-monitoring (via web-enabled glucometer) and goal setting (feedback provided when blood glucose below or above thresholds)</li> </ul>                                                                                                                                                                                        |
| 17.<br>(Lee Yew Kong et al., 2018) | Usability and utility evaluation of the web-based “Should I Start Insulin?” patient decision aid for patients with type 2 diabetes among older people                             | Malaysia<br>( <i>UMIC</i> )                           | DM (type 2)                          | E-health<br>( <i>web-based intervention</i> )                                            | <p>Web-based patient decision aid for insulin initiation:</p> <ul style="list-style-type: none"> <li>- website with interactive features to support decision-making process</li> </ul>                                                                                                                                                                                    |
| 18.<br>(Maar et al., 2016)         | Unpacking the Black Box: A Formative Research Approach to the Development of Theory-Driven, Evidence-Based, and Culturally Safe Text Messages in Mobile Health Interventions      | Tanzania<br>( <i>LIC</i> )<br>(Canada ( <i>HIC</i> )) | HTN                                  | E-health<br>( <i>mHealth, telemonitoring</i> )                                           | <p>Mobile health intervention:</p> <ul style="list-style-type: none"> <li>- Mobile phone app for trained CHW or nurses to link the mobile phone to the BP measurement device and allow transmission of the reading to the central server</li> <li>- SMS text messaging-based system: passive (promotion of healthy lifestyle) and active (based on BP results)</li> </ul> |
| 19.<br>(Ndou et al., 2013)         | A rapid assessment of a community health worker pilot programme to improve the management of hypertension and diabetes in Emfuleni sub-district of Gauteng Province, South Africa | South Africa<br>( <i>UMIC</i> )                       | DM (type not specified) and / or HTN | Community-based<br>( <i>including task-sharing</i> )<br>Adaptation of medicine provision | <p><b>CHW-led programme for DM and/or HTN management</b> – Monthly home visits:</p> <ul style="list-style-type: none"> <li>- Social support, health promotion and counselling, encouragement for appropriate visits to clinic</li> <li>- Home delivery of medication</li> <li>- Assessment of basic clinical indicators</li> </ul>                                        |
| 20.<br>(Peacock et al., 2020)      | A culturally informed lower-extremity complication prevention program for people living with diabetes in south India                                                              | India<br>( <i>LMIC</i> )                              | DM (type not specified)              | Community-based                                                                          | <p><b>Lower-extremity complication prevention programme</b> using “Culturally informed community nursing practice” process. CHWs</p> <ul style="list-style-type: none"> <li>- Community education session (group session)</li> <li>- Foot assessment</li> <li>- Self-care education</li> </ul>                                                                            |
| 21.<br>(Pichayapinyo et al., 2019) | Feasibility study of automated interactive voice response telephone calls with community health nurse follow-up to improve glycaemic control in patients with type 2 diabetes     | Thailand<br>( <i>UMIC</i> )                           | DM (type 2)                          | E-health<br>( <i>mHealth</i> )                                                           | <p>Telephone health intervention to support self-management:</p> <ul style="list-style-type: none"> <li>- automated interactive voice response calls to patients (weekly)</li> </ul>                                                                                                                                                                                      |

|                                      |                                                                                                                               |                                                                         |                                      |                                             |                                                                                                                                                                                                                                                                                                                    |
|--------------------------------------|-------------------------------------------------------------------------------------------------------------------------------|-------------------------------------------------------------------------|--------------------------------------|---------------------------------------------|--------------------------------------------------------------------------------------------------------------------------------------------------------------------------------------------------------------------------------------------------------------------------------------------------------------------|
|                                      |                                                                                                                               |                                                                         |                                      |                                             | <ul style="list-style-type: none"> <li>- automated follow-up email notifications to their nurses (weekly report)</li> <li>- Follow-up of patients as needed (by nurses)</li> </ul>                                                                                                                                 |
| 22.<br>(Rahmawati and Bajorek, 2015) | A Community Health Worker–Based Program for Elderly People With Hypertension in Indonesia: A Qualitative Study, 2013          | Indonesia<br>(LMIC)                                                     | HTN                                  | Community-based<br>(including task-sharing) | CHW-based programme – <b>the Integrated Health Service Post for the Elderly</b><br>(includes disease monitoring: BP check)                                                                                                                                                                                         |
| 23.<br>(Ramachandran et al., 2018)   | mDiabetes initiative using text messages to improve lifestyle and health-seeking behaviour in India                           | India<br>(LMIC)                                                         | DM (type not specified)              | E-health<br>(mHealth)                       | Mobile health programme:<br><ul style="list-style-type: none"> <li>- Tailored SMS text messages sent on alternate days (promotion of healthy lifestyle, basics of DM and medication adherence)</li> </ul>                                                                                                          |
| 24.<br>(Rho et al., 2017)            | Comparison of the Acceptance of Telemonitoring for Glucose Management Between South Korea and China                           | China<br>(UMIC)<br>(South Korea<br>(HIC) – not included in this review) | DM (type 2)                          | E-health<br>(Telemonitoring, mHealth)       | Telemonitoring for glucose control:<br><ul style="list-style-type: none"> <li>- Self-monitoring of blood glucose (using a glucometer connected to a web-based system)</li> <li>- Recommendations through online messages sent by nurses</li> <li>- Text messages or phone calls as needed</li> </ul>               |
| 25.<br>(Saleh et al., 2018)          | mHealth use for non-communicable diseases care in primary health: patients' perspective from rural settings and refugee camps | Lebanon<br>(UMIC)                                                       | DM (type not specified) and / or HTN | E-health<br>(mHealth)                       | Mobile health intervention:<br><ul style="list-style-type: none"> <li>- Educational SMS text messages sent weekly to patient or relatives (promotion of healthy lifestyle, medication adherence, symptoms of DM / HTN) and appointment reminders</li> </ul>                                                        |
| 26.<br>(Shen et al., 2017)           | Can a community-based peer-led diabetes self-management programme be effective: 12-week evaluation                            | China<br>(UMIC)                                                         | DM (type 2)                          | Community-based                             | <b>CHWs support and peer-led</b> self-management programme:<br><ul style="list-style-type: none"> <li>- Community health professional-led education group classes</li> <li>- Peer leaders-led self-efficacy enhancing group activities</li> <li>- Supervision: bi-weekly follow-up peer leader meetings</li> </ul> |

|                                                                                                                                                                                                                                                                                                                                                                                                                                                                                                                                                                      |                                                                                                                                                |                                                                                       |                  |                                                |                                                                                                                                                                                                                                                                                                                                                                |
|----------------------------------------------------------------------------------------------------------------------------------------------------------------------------------------------------------------------------------------------------------------------------------------------------------------------------------------------------------------------------------------------------------------------------------------------------------------------------------------------------------------------------------------------------------------------|------------------------------------------------------------------------------------------------------------------------------------------------|---------------------------------------------------------------------------------------|------------------|------------------------------------------------|----------------------------------------------------------------------------------------------------------------------------------------------------------------------------------------------------------------------------------------------------------------------------------------------------------------------------------------------------------------|
| 27.<br>(Van Olmen et al., 2017)                                                                                                                                                                                                                                                                                                                                                                                                                                                                                                                                      | Process evaluation of a mobile health intervention for people with diabetes in low-income countries – the implementation of the TEXT4DSM study | DRC<br>( <i>LIC</i> )<br>Cambodia<br>( <i>LIC</i> )<br>Philippines<br>( <i>LMIC</i> ) | DM (type 2 or 1) | E-health<br>( <i>mHealth</i> )                 | Mobile health intervention to support self-management:<br>- In addition to diabetes self-management education, SMS text messages were sent to participants several times a week (healthy behaviours and disease management)                                                                                                                                    |
| 28.<br>(Lazo-Porras et al., 2020)                                                                                                                                                                                                                                                                                                                                                                                                                                                                                                                                    | Foot thermometry with mHealth-based supplementation to prevent diabetic foot ulcers: A randomized controlled trial                             | Peru<br>( <i>UMIC</i> )                                                               | DM (type 2)      | E-health<br>( <i>mHealth, telemonitoring</i> ) | Foot thermometry and mobile health intervention to prevent diabetic foot ulcers:<br>- Education session on foot care<br>- Daily use of thermometry device by patients<br>- In case of alarm sign: follow-up by a nurse<br>- SMS text and voice messages sent weekly (reminder and foot-care promotion messages) to patient or caregiver via automated software |
| <p><sup>1</sup> Country level of income: LIC: low-income country; LMIC= lower middle-income country; UMIC= upper middle-income country; HIC= high income country</p> <p><sup>2</sup> Disease targeted (through the intervention): CAD= coronary artery disease; COPD= chronic obstructive pulmonary disease; DM= diabetes mellitus; HIV/AIDS= human immunodeficiency virus/acquired immunodeficiency syndrome; HTN= hypertension; NCD= non-communicable diseases; TB= tuberculosis</p> <p>Other abbreviations: BP= blood pressure; CHW= community health workers</p> |                                                                                                                                                |                                                                                       |                  |                                                |                                                                                                                                                                                                                                                                                                                                                                |
