# Supplementary material for: Factors Influencing the Implementation of Remote Delivery Strategies for Non-Communicable Disease Care in Low- and Middle-Income Countries: A Narrative Review
Source: PubMed Central journal article supplement (PMC9272771; doi:10.3389/phrs.2022.1604583), 2022-06-27

# Supplementary Material 6: Coding Framework Community Based Strategies

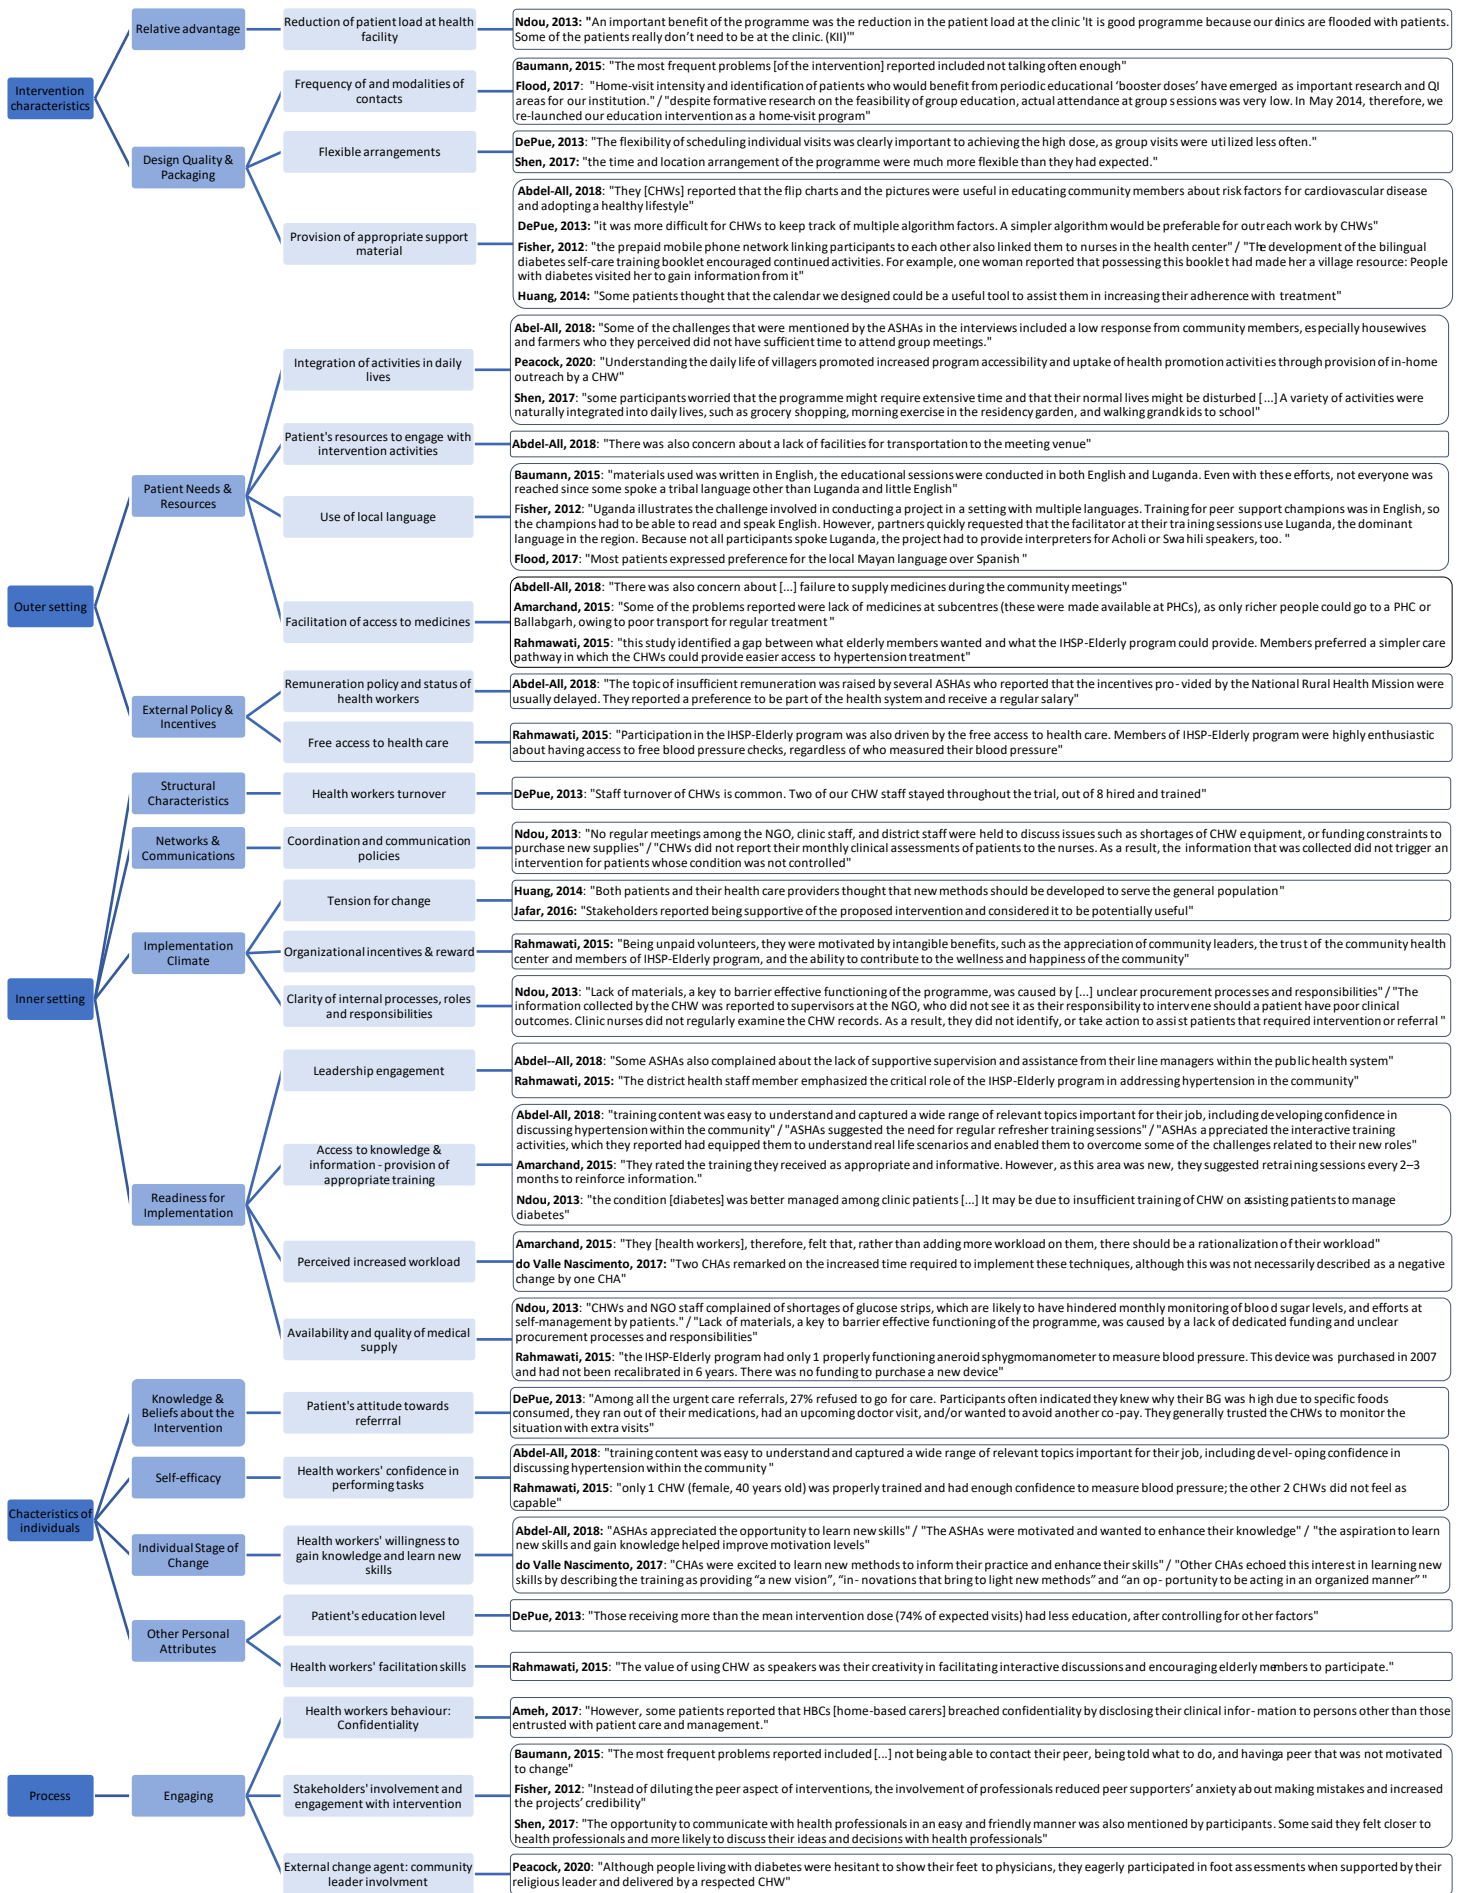

Supplement: DataSheet6.pdf [file DataSheet6.pdf]
